# Supplementary material for: Magnetic proline-based ionic liquid surfactant as a nano-carrier for hydrophobic drug delivery
Source: Royal Society of Chemistry journal article supplement (doi:10.1039/d0tb00176g), 2020-01-01
Supplement: d0tb00176g1.pdf [file d0tb00176g1.pdf]

## **Magnetic Proline based Ionic Liquid Surfactant as Nano-carrier for Hydrophobic Drug Delivery**

Akshay Kulshrestha,<sup>ab</sup> Praveen Singh Gehlot,<sup>c</sup> Arvind Kumar<sup>ab\*</sup>

<sup>a</sup>CSIR-Central Salt and Marine Chemicals Research Institute, Council of Scientific and Industrial Research, G. B. Marg, Bhavnagar, 364002, Gujarat India

<sup>b</sup>Academy of Scientific and Innovative Research (AcSIR), Ghaziabad-201002, India.

<sup>c</sup>Department of chemistry, Government Science College Pardi, Valsad-39612, Gujarat, India

**Contents:**

1. Structural scheme of synthesized  $[\text{ProC}_{10}][\text{FeCl}_3\text{Br}]$ .
2.  $^1\text{H}$  NMR of the synthesis of  $[\text{ProC}_{10}][\text{Br}]$ .
3. Raman spectra and EPR spectra of  $[\text{ProC}_{10}][\text{FeCl}_3\text{Br}]$ .
4. VSM graph for the  $[\text{ProC}_{10}][\text{FeCl}_3\text{Br}]$ .
5. DSC thermo gram of  $[\text{ProC}_{10}][\text{FeCl}_3\text{Br}]$  and Table showing various values obtained from TGA and DTG.
6. TEM images of  $[\text{ProC}_{10}][\text{Br}]$ .
7. Autocorrelation function of  $[\text{ProC}_{10}][\text{Br}]$  and  $[\text{ProC}_{10}][\text{FeCl}_3\text{Br}]$ .

**Annexure I** Derived surface parameters and their equations.

**Annexure II** Various mathematical models for drug release pattern.

## 1. Structural scheme of synthesized [ProC<sub>10</sub>] [FeCl<sub>3</sub>Br].

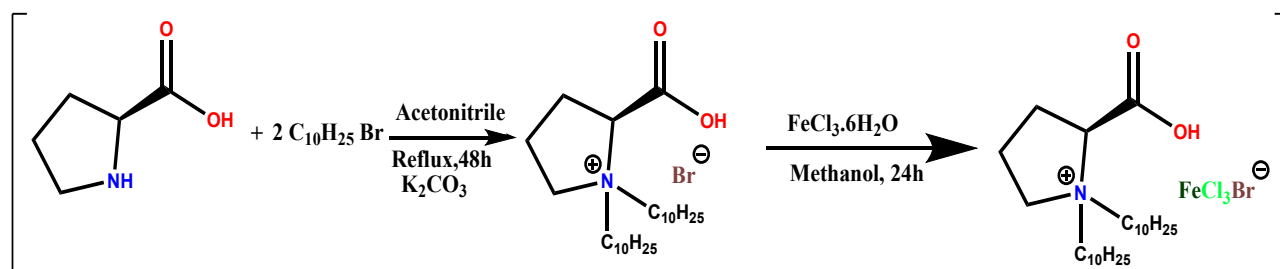

Figure S1. Synthetic procedure of [ProC<sub>10</sub>][FeCl<sub>3</sub>Br].

## 2. <sup>1</sup>H NMR of the synthesis of [ProC<sub>10</sub>] [Br]

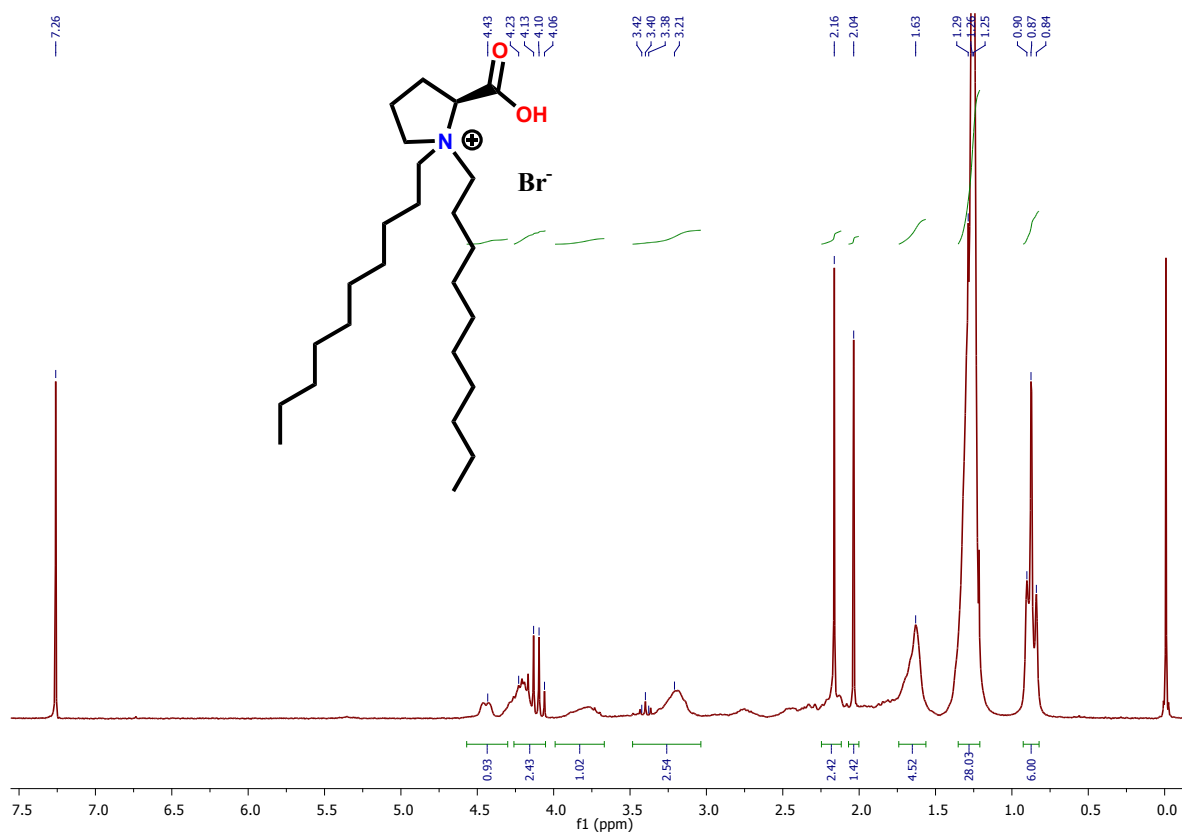

Figure S2. <sup>1</sup>H NMR of the synthesis of [ProC<sub>10</sub>] [Br].

<sup>1</sup>H NMR chemical shift values of [ProC<sub>10</sub>][Br]: CDCl<sub>3</sub>, 500MHz: δ<sub>H</sub> (ppm) 4.3(t, 1H), 4.00(t,2H,NCH<sub>2</sub>) 3.7 (s,1H,NCH<sub>2</sub>),3.21-3.4(m, 3H), 2.16(m, 2H, CH<sub>2</sub>), 2.04(m, 2H,CH<sub>2</sub>), 1.63 (m,4H,CH<sub>2</sub>), 1.25-1.29(m, 28H,CH<sub>2</sub>), 0.84-0.90(t,6H,CH<sub>3</sub>).

### 3. Raman spectra and EPR spectra of $[\text{ProC}_{10}][\text{FeCl}_3\text{Br}]^{1,2}$ :

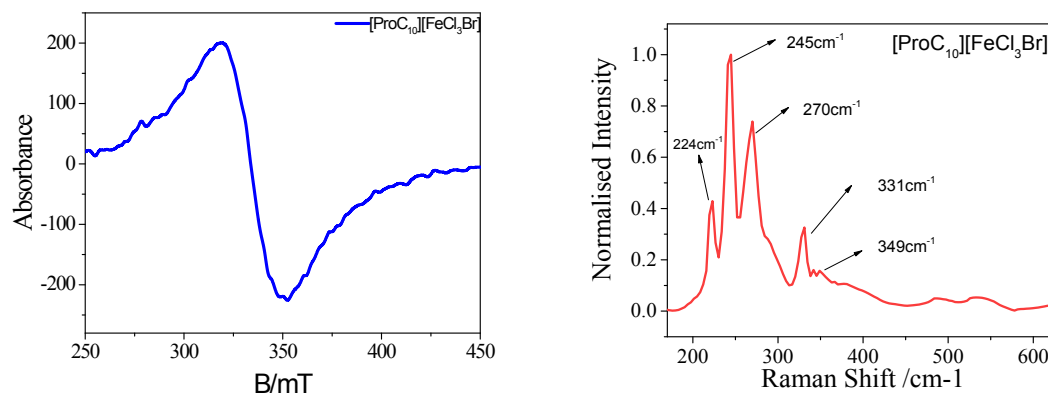

**Figure S3.** EPR spectra and Raman spectra of  $[\text{ProC}_{10}][\text{FeCl}_3\text{Br}]$  respectively.

### 4. VSM graph of $[\text{ProC}_{10}][\text{FeCl}_3\text{Br}]$

The field dependence magnetic susceptibility has been carried out for  $[\text{ProC}_{10}][\text{FeCl}_3\text{Br}]$  at room temperature for a magnetic field range -1.2T to 1.2T. However, there is no opening of hysteresis loop in both the cases. Moreover, there is no saturation upto 1.2T indicating that there are strong magnetic interactions among the metal centres.

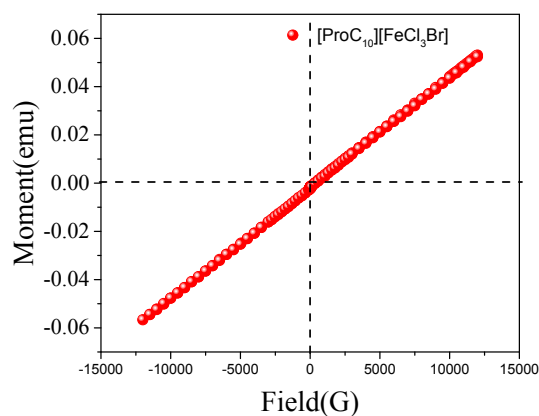

**Figure S4.** Represents the magnetic moment vs field graph of  $[\text{ProC}_{10}][\text{FeCl}_3\text{Br}]$ .

**5. DSC thermogram of [ProC<sub>10</sub>][FeCl<sub>3</sub>Br] and various values obtained from TGA and DTG.**

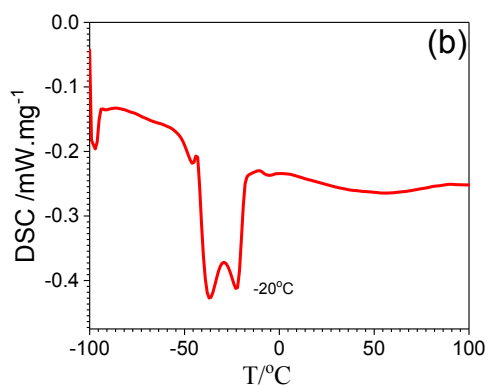

**Figure S5** DSC of [ProC<sub>10</sub>][FeCl<sub>3</sub>Br]

**Table S1:** T<sub>d</sub>, T<sub>start</sub> and T<sub>onset</sub> of [Pro C<sub>10</sub>][FeCl<sub>3</sub>Br] and [Pro C<sub>10</sub>][Br].

| MSAILS                                       | T <sub>start</sub> (°C) | T <sub>d</sub> (°C) | T <sub>onset</sub> (°C) |
|----------------------------------------------|-------------------------|---------------------|-------------------------|
| [Pro C <sub>10</sub> ][Br]                   | 148                     | 247                 | 170                     |
| [Pro C <sub>10</sub> ][FeCl <sub>3</sub> Br] | 220                     | 244                 | 240                     |

**6. TEM images of [ProC<sub>10</sub>][Br] .**

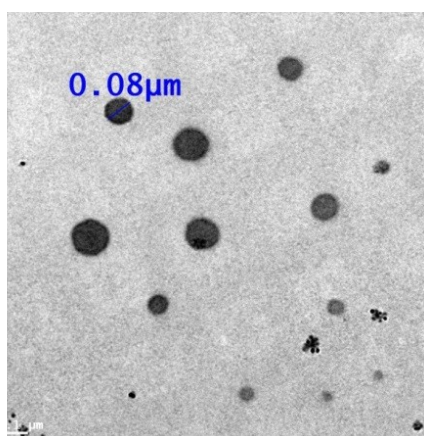

**Figure S6.**TEM images of [ProC<sub>10</sub>][Br]

## 7. Autocorrelation Function of MPSAILs

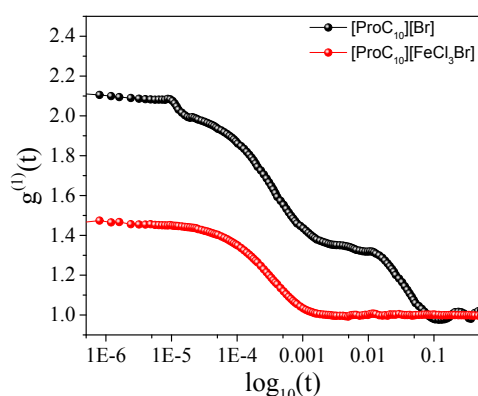

**Figure S7** Autocorrelation Function of [ProC<sub>10</sub>][Br] and [ProC<sub>10</sub>][FeCl<sub>3</sub>Br].

### Annexure I

The Surface parameter equation are as follow:<sup>3</sup>

1. The Adsorption efficiency ( $pC_{20}$ ) and Effectiveness of Surface tension reduction ( $\Pi_{CMC}$ ) of surfactant at air-water interface is estimated by using the relation (1)<sup>1,2</sup>

$$pC_{20} = -\log C_{20}, \quad \pi_{CMC} = \gamma_{H_2O} - \gamma_{CAC} \dots \dots \dots (1)$$

where,  $C_{20}$  is the concentration reduce by 20mNm<sup>-1</sup> from the surface tension of the solvent (water)<sup>1</sup>,  $\gamma_{H_2O}$  stands for the surface tension of the pure water and  $\gamma_{CMC}$  stands for the surface tension of the solvent medium at CMC.

2. The amount of surfactants adsorbed at the interface is estimated from relative surface excess concentration ( $\Gamma_{max}$ ). The values  $\Gamma_{max}$  of at the CMC have been calculated using Gibbs adsorption Eq. 2.

$$\Gamma_{max} = -\frac{1}{nRT} \frac{\partial \gamma}{\partial \ln C} \dots \dots \dots (2)$$

where “ $\partial \gamma / \partial \ln C$ ” is the slope of  $\gamma - \ln C$  plot in the pre CMC region and n is Gibbs adsorption coefficient.

3. Minimum area occupied by monomers at the interface was calculated using equation 4.

$$A_{\min} = \frac{10^{16}}{\Gamma_{\max} \cdot N_A} \dots\dots\dots(3)$$

where  $N_A$  is Avogadro number and the Unit of  $A_{\min}$  is  $\text{\AA}^2$ .

### Annexure-II

**Table S2:** Various mathematical models and their equations:<sup>4</sup>

| Mathematical Model      | Equation                           |
|-------------------------|------------------------------------|
| Zero Order              | $C_0 - C_t = K_0 t$                |
| First Order             | $\ln C = \ln C_0 - K_1 t$          |
| Higuchi model           | $Q = A \sqrt{D(2C_0 - C_s) C_s t}$ |
| Hixson–Crowell model    | $C_0^{1/3} - C_t^{1/3} = K_{HC} t$ |
| Korsmeyer- Peppas model | $M_t/M_\infty = K_{kp} t^n$        |

where  $C_0$  = initial concentration of the drug at time,  $t = 0$ ,  $C_t$  = amount of drug released at time  $t$ ,  $K_0$  = zero order constant,  $K_1$  = first order rate constant,  $C$  = percent of drug remaining at time  $t$ ,  $Q$  = Cumulative amount of drug released at time per unit area,  $C_s$  is the drug solubility in the matrix and  $D$  is the diffusion coefficient of the drug molecule in the matrix,  $C_s$  = drug solubility in the matrix and  $D$  = diffusion coefficient of the drug molecule in the matrix.  $M_t$  = amount of drug released in time  $t$ ,  $M_\infty$  = amount of drug released after time  $\infty$ ,  $n$  = diffusional exponent or drug release exponent, and  $K_{kp}$  = Korsmeyer release rate constant.

**Table S3.** A comparison of loading efficiency of ciprofloxacin drug in various surfactants or polymeric colloidal systems.

| S.No | Surfactant/ polymer                                                                            | Drug Carrier          | Loading efficiency (%) | Author                            | Year |
|------|------------------------------------------------------------------------------------------------|-----------------------|------------------------|-----------------------------------|------|
| 1.   | Present work [ProC <sub>10</sub> ][FeCl <sub>3</sub> Br]                                       | vesicles              | 84.2%                  | -                                 | -    |
| 2.   | Ciprofloxacin-HCl-Chitosan/Tween/Tri polyphosphate                                             | Micelle nanocomposite | 45-56%                 | Manea et al. <sup>52</sup>        | 2019 |
| 3.   | Block copolymers, poly( $\epsilon$ -caprolactone)-block-poly(lysine-stat-phenylalanine bioflim | vesicles              | 13-31%                 | Xi et al. <sup>55</sup>           | 2019 |
| 4.   | Pluronics ( Pluronic F108 and Pluronic L81)                                                    | Micelles              | N.R.                   | Senthilkumar et al. <sup>56</sup> | 2019 |
| 5.   | Long chain non-ionic surfactant N-(4-sulfamoylphenyl)dodecanamide                              | Vesicles              | 68-82%                 | Ali et al. <sup>57</sup>          | 2019 |
| 6.   | ( N-butyl acetate/polysorbate 80/ethanol/water )                                               | Microemulsion         | 3.6%                   | Saleem et al. <sup>58</sup>       | 2018 |
| 7.   | Effect of NaCl on interaction between SDS and HTEAB                                            | micelles              | N.R                    | Banipal et al. <sup>59</sup>      | 2018 |
| 8.   | Poly(ethylene oxide) (PEO), a surfactant Pluronic F-127                                        | Nanofibre             | 51%                    | Kyziol et al. <sup>60</sup>       | 2017 |
| 9.   | Surfactant method for core-shell mesoporous silica based layered double hydroxide              | disc-like morphology  | 37%                    | Barnabas et al. <sup>61</sup>     | 2017 |
| 10.  | Diacyl glycerol-arginine surfactants                                                           | vesicle               | 8-13%                  | Tavano et al. <sup>62</sup>       | 2014 |

**Table S4: Kinetics study of release of guest molecule by various mathematical models.**

| Guest Molecule | Release condition | *Zero Order    |       | *First order   |       | *Higuchi Model |       | *KorsMeyar Peppas |       | *Hixon Crowell |       |
|----------------|-------------------|----------------|-------|----------------|-------|----------------|-------|-------------------|-------|----------------|-------|
|                |                   | R <sup>2</sup> | Slope | R <sup>2</sup> | Slope | R <sup>2</sup> | Slope | R <sup>2</sup>    | Slope | R <sup>2</sup> | Slope |
| Pyrene         | pH 7              | 0.78           | 0.17  | 0.85           | 0.002 | 0.87           | 3.3   | 0.95              | 0.44  | 0.83           | 0.005 |
| Ciprofloxacin  | pH 7              | 0.92           | 1.19  | 0.99           | 0.015 | 0.97           | 11    | 0.99              | 0.69  | 0.97           | 0.037 |



## REFERENCE

1. Döbbelin, M.; Jovanovski, V.; Llarena, I.; Marfil, L. J. C.; Cabañero, G.; Rodriguez, J.; Mecerreyes, D. Synthesis of paramagnetic polymers using ionic liquid chemistry. *Polymer Chemistry* **2011**, *2*(6), 1275 DOI: 10.1039/c1py00044f.
2. Shongwe, M. S.; Al-Rahbi, S. H.; Al-Azani, M. A.; Al-Muharbi, A. A.; Al-Mjeni, F.; Matoga, D.; Gismelseed, A.; Al-Omari, I. A.; Yousif, A.; Adams, H.; et al. Coordination versatility of tridentate pyridyl aroylhydrazones towards iron: tracking down the elusive aroylhydrazono-based ferric spin-crossover molecular materials. *Dalton Transactions* **2012**, *41*(8), 2500 DOI: 10.1039/c1dt11407g.
3. Rosen, M. J.; Mathias, J. H.; Davenport, L. Aberrant Aggregation Behavior in Cationic Gemini Surfactants Investigated by Surface Tension, Interfacial Tension, and Fluorescence Methods. *Langmuir* **1999**, *15*(21), 7340–7346 DOI: 10.1021/la9904096.
4. Baishya, H. Application of Mathematical Models in Drug Release Kinetics of Carbidopa and Levodopa ER Tablets. *Journal of Developing Drugs* **2017**, *06*(02) DOI: 10.4172/2329-6631.1000171.
